# Supplementary material for: Guest Perceptions of Physical Activity Point-of-Decision Prompts at a Conservatory with Botanical Gardens
Source: MDPI journal article supplement (doi:10.3390/ijerph16122074), 2019-06-12
Supplement: s1 [file s1]

# Tree Pose

Target muscles: shoulders, back and legs

1

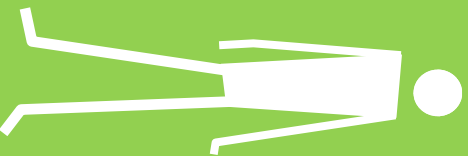

Stand with feet apart at hip-width keeping toes facing forward.

2

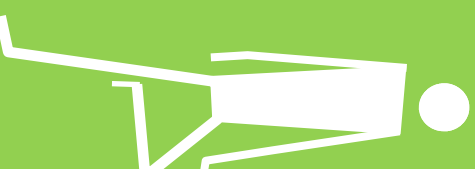

Bend left knee and place sole of left foot on the inside of right calf or thigh with toes pointing downward.

3

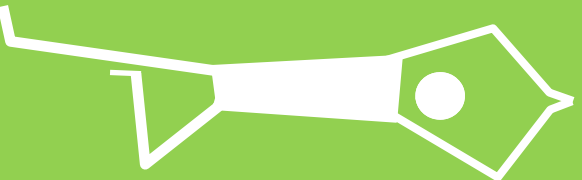

Slowly raise both arms above the head and place palms together, fingers upward.

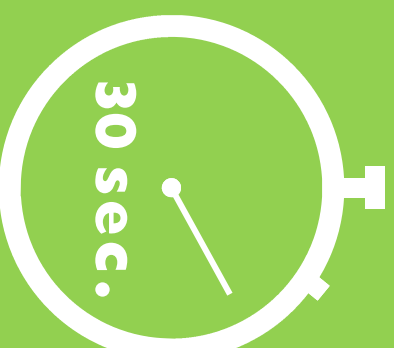

Balance for 30 seconds, and repeat bringing right foot to left leg.

# What's Under the Rock?

Target muscles: shoulders, back and legs

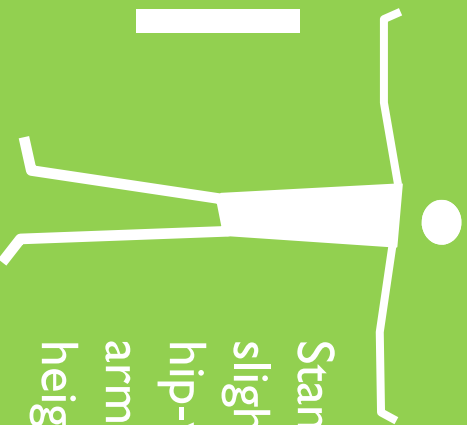

Stand with feet apart slightly wider than hip-width and raise arms to shoulder height.

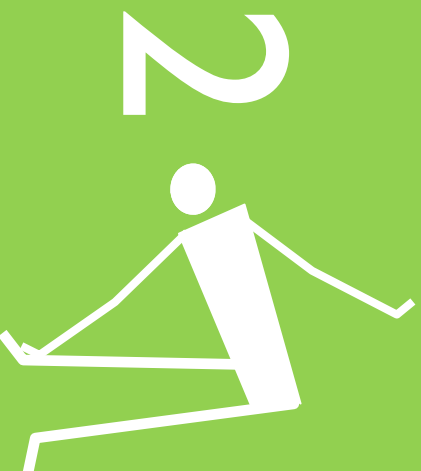

Bend and touch your left foot with your right hand.

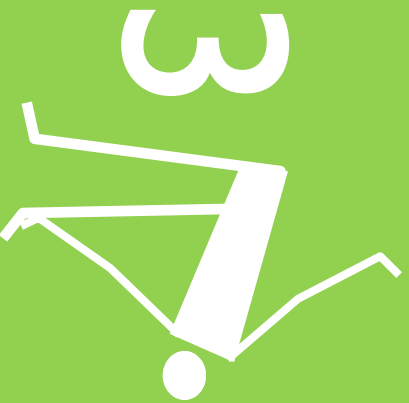

Repeat, touching your right foot with your left hand.

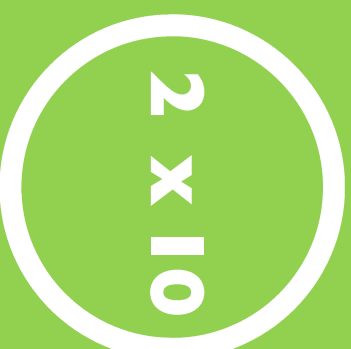

One set is touching both feet. Complete two sets of 10.

# Tree Climb

Target muscles: upper arms, core and legs

1

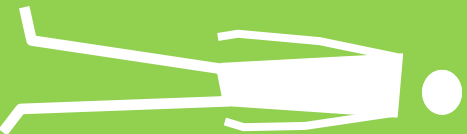

Stand with feet apart at hip-width with arms by sides.

2

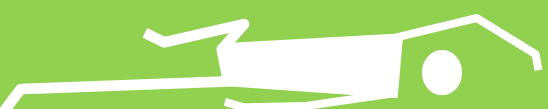

Raise right knee to 90 degrees and reach right arm to the sky.

3

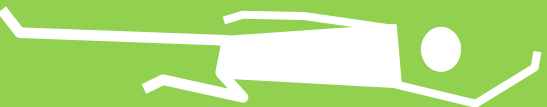

Switch to bring left knee to 90 degrees and left arm to the sky.

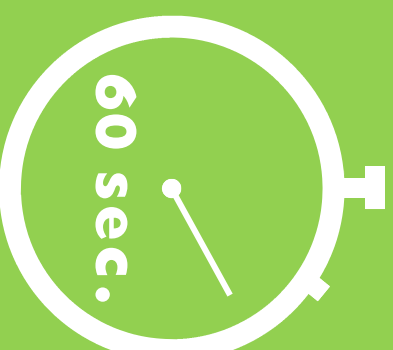

Repeat for 60 seconds.

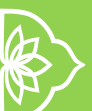

PHIPPS

Let's Move  
Pittsburgh

# Yoga Sunrise

Target muscles: full body stretch

1

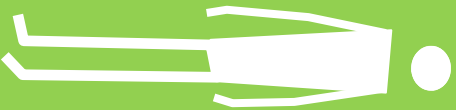

Stand with feet together.

2

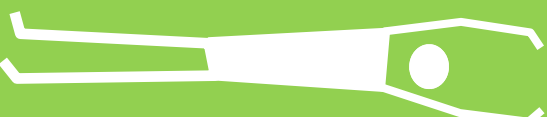

Reach arms to the sky.

3

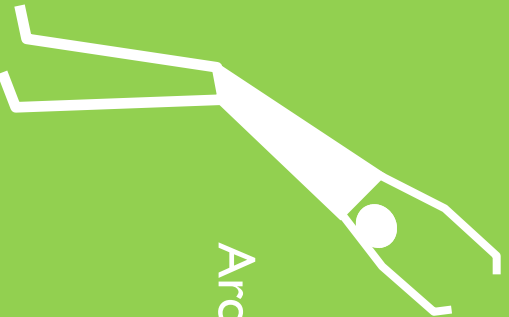

Arch back.

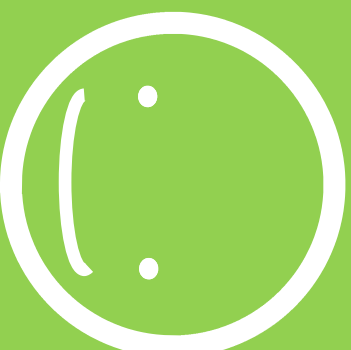

Repeat until refreshed.

# Butterfly Figure Eights

Target muscles: arms

1

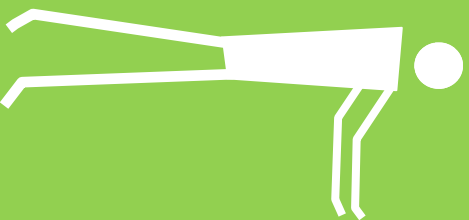

Extend both arms in front of you.

2

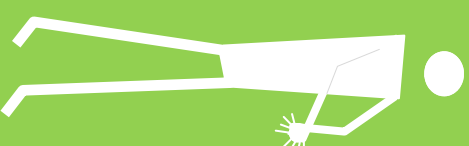

Make a butterfly with hands by crossing arms and clasping thumbs while keeping other fingers extended.

3

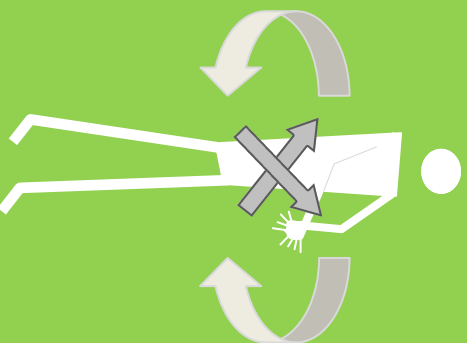

Trace large figure eights in the air while fluttering fingers.

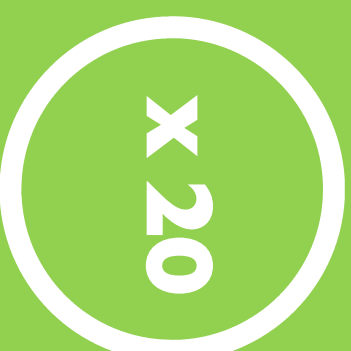

Reverse figure eight and repeat 20 times.

# Jitter-Buzz

Target muscles: whole body

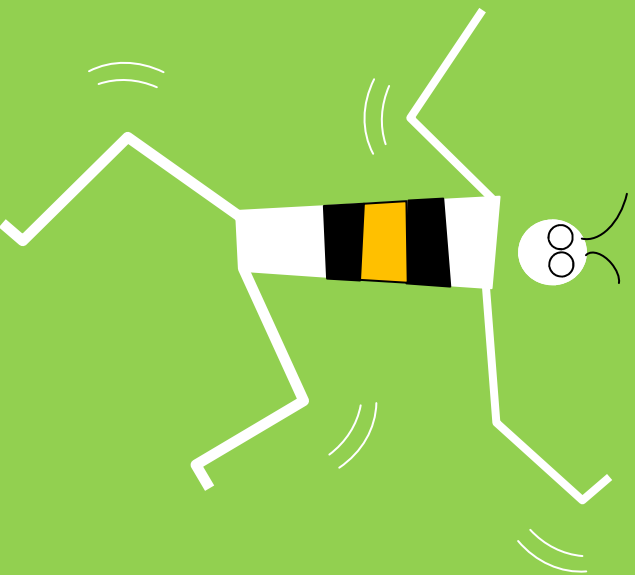

Discover your inner bee by dancing like a bee buzzing through the sky!

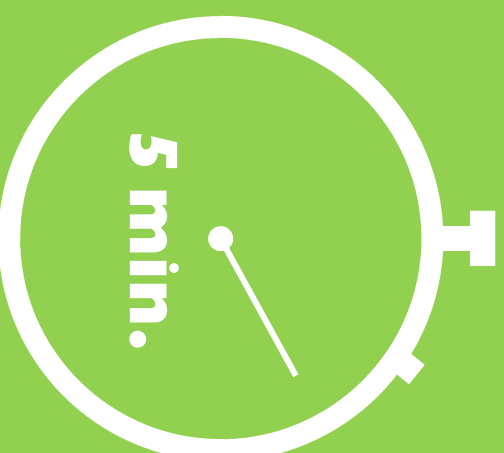

Buzz around for five minutes to get your heart pumping.

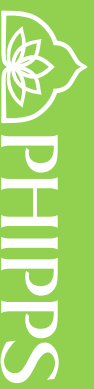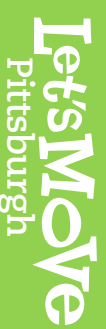

# Skip Around the World

Target muscles: Quadriceps, hamstrings and abs

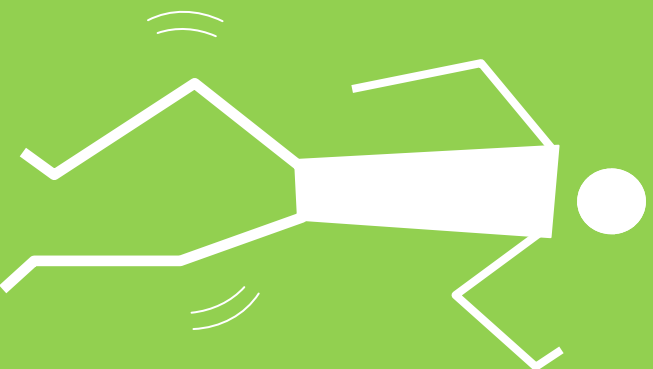

Step from right foot  
to left foot with a  
light bounce.

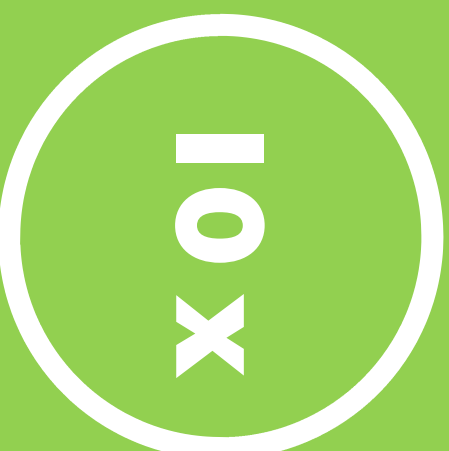

Circle the large  
round sign 10 times.
